# Supplementary material
Source: PubMed Central journal article supplement (PMC2702691)
Supplement: NIHMS4239-supplement-2.pdf [file NIHMS4239-supplement-2.pdf]

## SUPPLEMENTARY INFORMATION

### Clustering of IP<sub>3</sub> receptors by IP<sub>3</sub> retunes their regulation by IP<sub>3</sub> and Ca<sup>2+</sup>

Taufiq-Ur-Rahman<sup>1</sup>, Alexander Skupin<sup>2</sup>, Martin Falcke<sup>2,3</sup> & Colin W. Taylor<sup>1</sup>

<sup>1</sup>Department of Pharmacology, Tennis Court Road, Cambridge, CB2 1PD, UK.

<sup>2</sup>Mathematical Cell Physiology, Max Delbrück Centre for Molecular Medicine, Robert Rössle Str. 10, 13092 Berlin, Germany. <sup>3</sup>Helmholtz Centre Berlin for Materials and Energy, Glienicker Str. 100, 14109 Berlin, Germany.

#### Abbreviations

|                    |                                                                                                                                                                                                                                                   |
|--------------------|---------------------------------------------------------------------------------------------------------------------------------------------------------------------------------------------------------------------------------------------------|
| $\gamma$           | Single channel conductance.                                                                                                                                                                                                                       |
| $i$                | Single channel current.                                                                                                                                                                                                                           |
| $N, n$             | Total number of IP <sub>3</sub> R within a patch ( $N$ ), number of IP <sub>3</sub> R under consideration ( $n$ ); $N \geq n$ .                                                                                                                   |
| $NP_o$             | Experimentally determined collective activity of all IP <sub>3</sub> R within a patch (see equation 2).                                                                                                                                           |
| $P_o$              | Single channel open probability, whether measured directly from a single channel patch (where $P_o = P_{\text{alone}}$ ) or calculated from $NP_o$ for a multi-channel patch assuming that each channel behaves independently ( $P_o = NP_o/N$ ). |
| $P_{\text{alone}}$ | $P_o$ determined from a patch containing a single IP <sub>3</sub> R.                                                                                                                                                                              |
| $\tau_o, (\tau_c)$ | Apparent mean open (closed) time of a single IP <sub>3</sub> R.                                                                                                                                                                                   |
| $\tau_{o,N}$       | Apparent mean duration of openings in which all $N$ IP <sub>3</sub> R are simultaneously open.                                                                                                                                                    |
| $\tau_{\text{ib}}$ | Mean duration of events when all channels are closed in a patch containing $N$ IP <sub>3</sub> R (i.e. <u>inter-burst interval</u> ).                                                                                                             |

#### Materials and Methods

##### Culture of DT40 cells expressing rat IP<sub>3</sub>R3 or IP<sub>3</sub>R1

DT40 cells lacking genes for all three IP<sub>3</sub>R subtypes (DT40-KO cells)<sup>27</sup> and the same cells stably transfected with rat IP<sub>3</sub>R3 (DT40-IP<sub>3</sub>R3 cells) or rat IP<sub>3</sub>R1 (DT40-IP<sub>3</sub>R1 cells)<sup>10</sup> were maintained in RPMI 1640 medium supplemented with 10% foetal bovine serum, 1% heat-inactivated chicken serum, 2 mM L-glutamine and 10 mM 2-mercaptoethanol at 37°C in a humidified atmosphere containing 5% CO<sub>2</sub>. Cells were passaged (at  $\sim 2 \times 10^6$  cells/ml) every 2-3 days. Expression of IP<sub>3</sub>R3 was quantified by immunoblotting with an antiserum specific for IP<sub>3</sub>R3 (Transduction Laboratories)<sup>10</sup>.

##### IP<sub>3</sub>-evoked Ca<sup>2+</sup> release from intracellular stores

Ca<sup>2+</sup> uptake and release from the intracellular stores of populations of saponin-permeabilized DT40-IP<sub>3</sub>R3 cells was measured using a low-affinity Ca<sup>2+</sup> indicator (Mg-fluo-4) trapped within the ER<sup>28</sup>.

##### Single channel recording from nuclear patches

Nuclei were isolated by lysis of DT40 cells<sup>25</sup> and allowed to adhere in bathing solution (BS, 1 ml) to a petri dish coated with poly-D-ornithine (Sigma). BS had the following composition: 140 mM KCl, 10 mM Hepes, 100  $\mu$ M BAPTA, 51  $\mu$ M CaCl<sub>2</sub> (free [Ca<sup>2+</sup>] =

211 ± 9 nM), pH 7.1. Free Ca<sup>2+</sup> concentrations were computed using WinMaxC (<http://www.stanford.edu/~cpatton/maxc.html>) and confirmed using fluorescent Ca<sup>2+</sup> indicators<sup>10</sup> and Ca<sup>2+</sup>-sensitive electrodes. The measured values are shown in the table below. Pipettes were pulled from thick-walled borosilicate glass capillaries (GC150F, Harvard Instruments) and fire-polished. The pipette tip resistance was 10-15 MΩ when filled with pipette solution (PS: 140 mM KCl, 10 mM Hepes, 500 μM BAPTA, 258 μM CaCl<sub>2</sub> (free [Ca<sup>2+</sup>] = 229 ± 24 nM), 5 mM Na<sub>2</sub>ATP, pH 7.1). Variations in the composition of PS including addition of IP<sub>3</sub> (American Radiolabeled Chemicals) are described in the text. Recordings were at 22°C with patches excised from the on-nucleus configuration. To prevent formation of vesicles, excised patches were sometimes exposed to air for 1-5 s. Seals with resistances >5 GΩ were routinely obtained. Currents were amplified using an Axopatch 200B amplifier, filtered at 1 kHz (-3dB) and digitized at 10 kHz with a Digidata 1322A interface and pClamp 9.2 software (Axon Instruments). Unless otherwise stated, all recordings were at +40 mV. Open channel noise precluded use of lesser filtering to improve the temporal resolution of our recordings.

|    | Nominal free [Ca <sup>2+</sup> ], nM | Measured free [Ca <sup>2+</sup> ], nM |
|----|--------------------------------------|---------------------------------------|
| BS | 200                                  | 211 ± 9 (n = 4) <sup>a</sup>          |
| PS | 200                                  | 229 ± 24 (n = 4) <sup>a</sup>         |
| PS | 1000                                 | 1498 ± 93 (n = 4) <sup>a</sup>        |
| PS | 1000                                 | 1450 ± 210 (n = 4) <sup>b</sup>       |

<sup>a</sup>Determined with fluo 3; <sup>b</sup>determined with a Ca<sup>2+</sup>-selective electrode.

### Flash photolysis of caged IP<sub>3</sub>

For flash photolysis experiments, pipettes were prepared from thin-walled, non-filamented borosilicate glass capillaries (Harvard Instruments). Pipettes had resistances of 15-20 MΩ when filled with PS. PS contained 100 μM D-*myo*-inositol 1,4,5-trisphosphate, (4,5)-1-(2-nitrophenyl) ethyl ester (“caged IP<sub>3</sub>”, Calbiochem). After recording for 30-60 s, IP<sub>3</sub> was released into PS by photolysis of caged IP<sub>3</sub> using a single high-intensity flash (1 ms) from a Xe-flash lamp (XF-10, Hi-Tech Scientific; 240 J with the capacitor charged to 385 V) passed through a filter (300-350 nm)<sup>29,30</sup>.

### Analysis of patch-clamp records

Currents were idealized using the segmental k-means (SKM) hidden-Markov algorithm of the QuB suite ([www.qub.buffalo.edu](http://www.qub.buffalo.edu)) at full bandwidth (1 kHz) initially using a simple two state scheme (C ⇌ O)<sup>31</sup>.

For both single and multi-IP<sub>3</sub>R patches, the probability ( $P_{o,n}$ ) of channels simultaneously opening to the n<sup>th</sup> current level, was calculated from the ratio of the area of the n<sup>th</sup> current level ( $A_{o,n}$ ) to the total area ( $A_{total}$ ) of the amplitude histogram<sup>32</sup>:

$$P_{o,n} = \frac{A_{o,n}}{A_{total}} = \frac{A_{o,n}}{A_{closed} + \sum_{n=1}^{n=N} A_{o,n}} \quad (1)$$

$NP_o$  was calculated from<sup>33,34</sup>:

$$NP_o = \frac{\sum_{n=1}^N (n \cdot t_n)}{T} \quad (2)$$

where:  $t_n$  is the total time for which  $n$  IP<sub>3</sub>R are simultaneously open, and  $T$  is the duration of the recording.

For single channel records, dwell time analysis used the MIL module of QuB with retrospective imposition of a dead time of 200  $\mu$ s for approximate correction of missed events<sup>31</sup>. Dwell time distributions were analysed according to<sup>35,36</sup>. Mean dwell times are presented as ‘apparent’ values because of our inability to resolve events briefer than the dead time of the system.

The best gating scheme (based on the log-likelihood ratio) comprised two closed (C) states connected linearly to an open (O) state, with either of the following topologies:  $C_1 \leftrightarrow O \leftrightarrow C_2$  or  $C_2 \leftrightarrow C_1 \leftrightarrow O$ . Both topologies are equally compatible with the observed bursting behaviour of IP<sub>3</sub>R stimulated with a maximal concentration of IP<sub>3</sub>: each returns almost identical values for the dwell-time constants and their amplitudes (Rahman and Taylor, unpublished observation)<sup>37</sup>. Our present analyses and simulations focus on IP<sub>3</sub>R stimulated with saturating concentrations of IP<sub>3</sub> and on changes in  $P_o$  and  $\tau_o$  (which are the same for both topologies). For simplicity we therefore use the  $C_2 \leftrightarrow C_1 \leftrightarrow O$  scheme (Fig. 1d). This scheme predicts accurately the behaviour of both lone and clustered IP<sub>3</sub>R (Supplementary Fig. 6, Supplementary Table 4).

For determination of  $\tau_o$  from flash photolysis experiments, single channel open events within each 0.5 s time bin were separately idealized and the open times from all recordings were pooled, exported to ClampFit and fitted empirically using the method of maximum likelihood<sup>38</sup>.

### Reliable counting of IP<sub>3</sub>R within nuclear patches

The number of active IP<sub>3</sub>R ( $N$ ) within a nuclear patch can be confidently ( $p < 0.01$ ) equated to the maximum number of multiples of the unitary current level observed throughout a recording lasting longer than  $5(\sigma_{N+1})$  (Ref. 12), where:

$$\sigma_N = \left[ \frac{\tau_o}{N(P_o)^N} \right] \exp\left( \frac{N \times t_D}{\tau_o} \right) \quad (3)$$

where,  $\sigma_N$  = the mean interval between successive simultaneous openings of all  $N$  IP<sub>3</sub>R,  $t_D$  = minimum duration of an open event detectable after filtering (= 200  $\mu$ s). Under typical recording conditions with 200 nM cytosolic free  $[Ca^{2+}]$  and 10  $\mu$ M IP<sub>3</sub>, IP<sub>3</sub>R within a cluster have  $P_o = 0.25$ , and  $\tau_o = 5.6$  ms. A recording of  $>2.06$  s is therefore sufficient confidently to identify 3 IP<sub>3</sub>R within such a patch. The largest number of IP<sub>3</sub>R/patch reported herein (8, after pre-treatment of nuclei with IP<sub>3</sub>, Fig. 3a) requires a recording of  $>1125$  s. All recordings lasted  $>30$  s, those addressing the effects of pre-treatment with IP<sub>3</sub> (Fig. 3) lasted  $>10$  min, and those assessing the effects of lower concentrations of IP<sub>3</sub> typically lasted 5-15 min.

### Predicting $P_o$ assuming independent IP<sub>3</sub>R in multi-IP<sub>3</sub>R patches

If a patch contains  $N$  identical and independent IP<sub>3</sub>R, each with a probability  $P_o$  of being open, the probability of  $n$  channels being simultaneously open is given by the binomial distribution<sup>39</sup>:

$$P_{o,n} = \frac{N!}{n!(N-n)!} P_o^n (1-P_o)^{N-n} \quad (4)$$

The predicted  $P_o$  of a single IP<sub>3</sub>R in a patch containing several ( $N$ ) IP<sub>3</sub>R was calculated from the probability of all  $N$  channels being simultaneously open ( $P_{o,N}$ ):

$$P_o = \sqrt[N]{P_{o,N}} \quad (5)$$

For convenience, the equivalent analysis of  $P_o$  for multi-IP<sub>3</sub>R patches exposed to high- $\text{Ca}^{2+}$  (Fig. 4) used  $NP_o/N$  to calculate  $P_o$  and so to assess whether IP<sub>3</sub>R opened independently. This is justified because with 1  $\mu\text{M}$   $\text{Ca}^{2+}$ ,  $NP_o$  of multi-IP<sub>3</sub>R patches matches that expected from the sum of the behaviour of lone IP<sub>3</sub>R (Fig. 4c).

### Comparisons of the kinetic behaviour of single- and multi-IP<sub>3</sub>R patches

For multi-IP<sub>3</sub>R patches containing  $N$  IP<sub>3</sub>R,  $\tau_o$  and  $\tau_{c2}$  were estimated as described<sup>40,41</sup>:

$$\tau_o = N \cdot \tau_{o,N} \quad (6)$$

$$\tau_{c2} = N \cdot \tau_{ib} \quad (7)$$

For a patch with  $N$  IP<sub>3</sub>R,  $\tau_{c2}$  obtained from equation 7 is the average duration of gaps between the opening bursts of each individual IP<sub>3</sub>R.

### Comparison of the number of transitions between IP<sub>3</sub>R states for lone and paired IP<sub>3</sub>R exposed to 1 $\mu\text{M}$ $\text{Ca}^{2+}$

For IP<sub>3</sub>R stimulated with 10  $\mu\text{M}$  IP<sub>3</sub> and 1  $\mu\text{M}$   $\text{Ca}^{2+}$ , observed numbers of transitions to each of the 3 states in patches with 2 IP<sub>3</sub>R (C, O1 and O2) were compared with the predicted numbers assuming that each IP<sub>3</sub>R behaved independently<sup>26</sup>. Briefly, all transitions ( $18076 \pm 3808$  transitions/recording,  $n = 6$ ) during a 2-min recording were counted.  $P_o$  derived from patches containing only a single IP<sub>3</sub>R stimulated under identical conditions was used to predict the expected number of transitions to each state. The results are shown in Fig. 4g and Supplementary Fig 9.

### Data analysis

Prism 4 (GraphPad Software Inc) was used for statistical analyses, with  $p < 0.05$  denoting significance. Student's t-test and one-way ANOVA were used as appropriate to determine significance, and  $\chi^2$  test for comparing observed and predicted distributions. Concentration-response relationships were fitted by a Hill equation using a non-linear iterative, least-squares fitting (unweighted) procedure (GraphPad Prism 4):

$$P_o = P_{o(\max)} / (1 + \text{EC}_{50} / [\text{IP}_3]^n) \quad (8)$$

where,

$\text{EC}_{50}$ , half-maximally effective concentration of IP<sub>3</sub>.

$n$ , Hill coefficient.

## Supplementary Discussion

### Spacing of IP<sub>3</sub>R before and after clustering

Our experimental analysis shows that the decreased  $P_o$  of clustered IP<sub>3</sub>R cannot result from Ca<sup>2+</sup> passing through IP<sub>3</sub>R regulating the activities of neighbouring IP<sub>3</sub>R. With identical free [Ca<sup>2+</sup>] in BS and PS (200 nM), any Ca<sup>2+</sup> flux at the holding potential of +40 mV used for most analyses would be small, away from the cytosolic surface of the IP<sub>3</sub>R, and rapidly buffered by BAPTA. Furthermore, in two experiments with patches containing 3 IP<sub>3</sub>R and performed at a holding potential of -40 mV, when any Ca<sup>2+</sup> flux would be in the opposite direction (i.e. towards the cytosolic surface of the IP<sub>3</sub>R), the effects of clustering were indistinguishable from those observed at positive holding potentials. Under these conditions, the three IP<sub>3</sub>R were independently gated, but with a  $P_o$  (0.22) that was only 48% that of  $P_o$  for a lone IP<sub>3</sub>R (0.44) recorded under the same conditions (not shown). We conclude that the communication between IP<sub>3</sub>R that allows clustering to reduce  $P_o$  must be mediated by physical contact between IP<sub>3</sub>R, from which we can estimate the likely separations of lone and clustered IP<sub>3</sub>R.

Our recordings from excised nuclear patches (estimated patch-pipette diameter ~1 μm) include a membrane area of at least 0.79 μm<sup>2</sup> (it may be larger if membrane is drawn into the pipette). The pores of neighbouring IP<sub>3</sub>R (1.34 ± 0.13 IP<sub>3</sub>R/patch; 1 IP<sub>3</sub>R/0.59 μm<sup>2</sup>) are therefore separated by an average distance of ~0.9 μm (i.e. the diameter of a patch with an area of 0.59 μm<sup>2</sup>). After clustering, we suggest that neighbouring IP<sub>3</sub>R must be in contact: their pores must therefore be ~18 nm apart (the diameter of an IP<sub>3</sub>R)<sup>42</sup>. With an average of 4.25 ± 0.38 IP<sub>3</sub>R/cluster (Figs 3c, g), and assuming that clusters (like lone IP<sub>3</sub>R) are randomly distributed, each cluster must be accommodated in an area of membrane equal to 4.25-times that occupied by a single IP<sub>3</sub>R (i.e. 2.51 μm<sup>2</sup>, diameter = 1.8 μm). Hence the average separation of IP<sub>3</sub>R clusters must be ~1.8 μm.

### Time course of IP<sub>3</sub>R3 diffusion and clustering

Our analysis of IP<sub>3</sub>R3 clustering suggests that it proceeds with a half-time of about 1.5-2 s ( $k = \sim 0.4 \text{ s}^{-1}$ ) (Fig. 3i) and without need of the cytoskeleton (Supplementary Fig. 4). Two studies of IP<sub>3</sub>R3 diffusion within ER membranes using fluorescence recovery after photobleaching (FRAP) suggest that most IP<sub>3</sub>R3 are mobile<sup>22</sup> with a diffusion coefficient ( $D$ ) of 0.03-0.04 μm<sup>2</sup>/s (Ref. 22) or 0.45 μm<sup>2</sup>/s (Ref. 21). We use an intermediate value,  $D = 0.1 \text{ μm}^2/\text{s}$ , for our calculation of IP<sub>3</sub>R3 mobility. The reaction rate ( $k$ ) of proteins diffusing in a membrane patch can be estimated by Eq. 47 in Ref. 43:

$$k = N2\pi D / A \log(r^P / r^C) \quad (9)$$

where,

$N$ , number of channels per patch (2 in this example to give the lowest estimate of  $k$ ).

$D$ , diffusion coefficient (0.1 μm<sup>2</sup>/s, see above).

$A$ , area of patch (0.79 μm<sup>2</sup>, see *Spacing of IP<sub>3</sub>R before and after clustering*).

$r^C$ , radius of IP<sub>3</sub>R (9 nm, Ref. 42).

$r^P$ , radius of patch (~0.5 μm).

from which,  $k = 0.91 \text{ s}^{-1}$ .

These approximations suggest that diffusion alone ( $k = 0.91 \text{ s}^{-1}$ ) is sufficient to allow IP<sub>3</sub>R3 to encounter each other with sufficient frequency to account for the estimated time course of IP<sub>3</sub>R3 clustering ( $k \sim 0.4 \text{ s}^{-1}$ , Fig. 3i, Supplementary Fig. 8).

### Effects of IP<sub>3</sub>R clustering on intracellular Ca<sup>2+</sup> spiking

Our single channel analyses are best explained by the following gating scheme (Fig. 1d, Supplementary Fig. 6, Supplementary Table 1, and see *Analysis of patch-clamp records*):

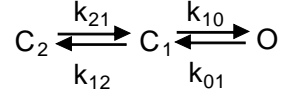

Channels move rapidly between C<sub>1</sub> and O (to give bursts of openings) and more slowly between C<sub>2</sub> and C<sub>1</sub> (to give long inter-burst intervals). Clustering of IP<sub>3</sub>R has no effect on k<sub>10</sub> (because the short-closed time, τ<sub>c1</sub>, which is largely determined by k<sub>10</sub>, is unaffected by clustering) or on k<sub>21</sub> (because the long-closed time, τ<sub>c2</sub>, is unaffected by clustering) (Supplementary Fig. 5, Supplementary Table 3). Clustering increases k<sub>01</sub> (τ<sub>o</sub> is shorter for clustered IP<sub>3</sub>R, Fig. 3f) and this is alone sufficient to account for the observed decrease in P<sub>o</sub> (Supplementary Fig. 6, Supplementary Table 4). The increase in k<sub>01</sub> (from 84 s<sup>-1</sup> to 185 s<sup>-1</sup>) means that transitions from O to C<sub>1</sub> occur twice as frequently for clustered IP<sub>3</sub>R. With no change in k<sub>10</sub> or k<sub>12</sub>, the more frequent visits to C<sub>1</sub> mean that the ‘decision’ on whether to move to C<sub>2</sub> (and so terminate a burst) or back to O (to give another short opening) is unchanged for clustered IP<sub>3</sub>R but made twice as often as for lone IP<sub>3</sub>R. The average number of openings in each burst is therefore the same for lone and clustered IP<sub>3</sub>R, but the duration of the bursts is reduced for clustered IP<sub>3</sub>R (Supplementary Table 4). The key point for our simulations is that shortening of τ<sub>o</sub> (Fig. 3f) causes equivalent shortening of the bursts and entirely accounts for the changed behaviour of clustered IP<sub>3</sub>R.

We simulate the cytosolic [Ca<sup>2+</sup>] in a spherical cell (see Parameters Table 1) and examine the effect of IP<sub>3</sub>R clustering on Ca<sup>2+</sup> spikes. We give particular attention to the effects of changes in τ<sub>o</sub> on the frequency of these Ca<sup>2+</sup> spikes because Ca<sup>2+</sup> signals in many cells are frequency-coded as intracellular Ca<sup>2+</sup> spikes<sup>1,44-46</sup>. For our simulations, Ca<sup>2+</sup> release from the ER is via IP<sub>3</sub>R that open and close randomly according to the channel state dynamics described below. Ca<sup>2+</sup> diffuses in the cytosol, where it is both bound to buffers and actively pumped back into the ER by SR/ER Ca<sup>2+</sup>-ATPases (SERCA). The nonlinear parts of the concentration dynamics in the bulk (Ca<sup>2+</sup> binding to buffers and transport by SERCA) are linearized, which is an excellent approximation for a wide range of parameters<sup>47,48</sup>, and the concentration dynamics are solved by three-component Green’s functions (Skupin and Falcke, unpublished). The channel state dynamics use the DeYoung-Keizer model (DK model)<sup>49</sup>, which has been extensively used to simulate IP<sub>3</sub>-mediated Ca<sup>2+</sup> signalling<sup>24</sup>. The model assumes that each IP<sub>3</sub>R has four identical subunits, each with a binding site for IP<sub>3</sub> and two Ca<sup>2+</sup>-binding sites. A subunit is active if it has IP<sub>3</sub> bound, Ca<sup>2+</sup> bound to the stimulatory Ca<sup>2+</sup>-binding site, and no Ca<sup>2+</sup> bound to the inhibitory Ca<sup>2+</sup>-binding site. In the DK model, a channel is open when at least three of its four subunits are in the active state; otherwise it is closed. The open state of the IP<sub>3</sub>R in the DK model corresponds to a burst in our single channel records. For the DK model, the current averaged over a burst (*I*<sub>burst</sub>) is given by:

$$I_{\text{burst}} = I_s \tau_o / (\tau_o + \tau_{c1})$$

where, *I*<sub>s</sub> is the single channel current (estimated to be 0.12 pA)<sup>47</sup>.

To allow burst length to be changed in accord with the experimental observations (ie decreased by ~50% for clustered IP<sub>3</sub>R) within the framework of the DK model, the Ca<sup>2+</sup> dissociation ( $k_{\text{Cadiss}}$ ) rate was adjusted. It depends on  $\tau_0$ :

$$k_{\text{Cadiss}} = b_5 \tau_c 1(\tau_0 + \tau_c 1)^{-1} \text{ (see Parameter Table 2).}$$

If we instead adjust the dissociation rate of IP<sub>3</sub> to be  $\tau_0$ -dependent, the  $\tau_0$ -dependent effects shown in Supplementary Fig. 7 are even more pronounced (not shown). We consider two arrangements of 32 IP<sub>3</sub>R, each with the same overall channel density, but corresponding to the situations before and after IP<sub>3</sub>-evoked clustering. Lone IP<sub>3</sub>R (red in Supplementary Fig. 7a) separated by 1.5  $\mu\text{m}$  (see *Spacing of IP<sub>3</sub>R before and after clustering*)<sup>24,50</sup>, and tight clusters of four IP<sub>3</sub>R (blue) separated by 2.48  $\mu\text{m}$ . We initially used regular configurations (rather than the random distributions observed experimentally, Fig. 1f) to avoid artifacts arising from specific configurations that might arise randomly (Supplementary Fig. 7b-d). Similar results were obtained when we used random configurations of clusters with the same average cluster density (Supplementary Fig. 7e).

**Parameter Table 1 | Parameter values for the concentration dynamics**

|                           |                                      |                                                                              |
|---------------------------|--------------------------------------|------------------------------------------------------------------------------|
| $R$                       | 10 $\mu\text{m}$                     | Cell radius                                                                  |
| $a$                       | 8 nm                                 | Channel radius                                                               |
| $D_{\text{Ca}}$           | 220 $\mu\text{m}^2\text{s}^{-1}$     | Diffusion coefficient of cytosolic Ca <sup>2+</sup>                          |
| $D_{\text{E}}$            | 70 $\mu\text{m}^2\text{s}^{-1}$      | Diffusion coefficient of luminal Ca <sup>2+</sup>                            |
| $D_{\text{B}}$            | 95 $\mu\text{m}^2\text{s}^{-1}$      | Diffusion coefficient of mobile buffer                                       |
| $[\text{Ca}^{2+}]_0$      | 48 nM                                | Basal cytosolic Ca <sup>2+</sup> concentration                               |
| $[\text{IP}_3]$           | 0.4 $\mu\text{M}$                    | IP <sub>3</sub> concentration                                                |
| $[\text{B}]_{\text{T}}$   | 45 - 65 $\mu\text{M}$                | Total mobile buffer concentration                                            |
| $k_{\text{B}}^+$          | 600 ( $\mu\text{Ms}$ ) <sup>-1</sup> | On rate of the mobile buffer                                                 |
| $k_{\text{B}}^-$          | 100 s <sup>-1</sup>                  | Dissociation rate of the mobile buffer                                       |
| $[\text{B}_i]_{\text{T}}$ | 30 $\mu\text{M}$                     | Total immobile buffer concentration                                          |
| $k_{\text{Bi}}^+$         | 600 ( $\mu\text{Ms}$ ) <sup>-1</sup> | On rate of the immobile buffer                                               |
| $k_{\text{Bi}}^-$         | 100 s <sup>-1</sup>                  | Dissociation rate of the immobile buffer                                     |
| $P_{\text{p}}$            | 100 s <sup>-1</sup>                  | Pump rate                                                                    |
| $\sigma_{\text{p}}$       | 4.3x10 <sup>6</sup> s <sup>-1</sup>  | Channel flux constant                                                        |
| $\sigma_{\text{l}}$       | ~0.01 s <sup>-1</sup>                | Leak flux constant implicit given by $P_{\text{p}}$ and $[\text{Ca}^{2+}]_0$ |

**Parameter Table 2 | Parameter values for the DK model**

|                |                           |                                                                                                 |
|----------------|---------------------------|-------------------------------------------------------------------------------------------------|
| a <sub>1</sub> | 20 (μMs) <sup>-1</sup>    | IP <sub>3</sub> binding with no inhibiting Ca <sup>2+</sup> bound                               |
| b <sub>1</sub> | 20 s <sup>-1</sup>        | IP <sub>3</sub> dissociation with no inhibiting Ca <sup>2+</sup> bound                          |
| a <sub>2</sub> | 0.001 (μMs) <sup>-1</sup> | Ca <sup>2+</sup> binding to Ca <sup>2+</sup> -inhibitory site with IP <sub>3</sub> bound        |
| b <sub>2</sub> | 0.03 s <sup>-1</sup>      | Ca <sup>2+</sup> dissociation from Ca <sup>2+</sup> -inhibitory site with IP <sub>3</sub> bound |
| a <sub>3</sub> | 2.6 (μMs) <sup>-1</sup>   | IP <sub>3</sub> binding with Ca <sup>2+</sup> bound to Ca <sup>2+</sup> -inhibitory site        |
| b <sub>3</sub> | 20 s <sup>-1</sup>        | IP <sub>3</sub> dissociation with Ca <sup>2+</sup> bound to Ca <sup>2+</sup> -inhibitory site   |
| a <sub>4</sub> | 0.025 (μMs) <sup>-1</sup> | Ca <sup>2+</sup> binding to Ca <sup>2+</sup> -inhibitory site with no IP <sub>3</sub> bound     |
| b <sub>4</sub> | 0.1 s <sup>-1</sup>       | Ca <sup>2+</sup> dissociation from Ca <sup>2+</sup> -inhibitory site without IP <sub>3</sub>    |
| a <sub>5</sub> | 10 (μMs) <sup>-1</sup>    | Ca <sup>2+</sup> binding to Ca <sup>2+</sup> -activating site                                   |
| b <sub>5</sub> | 1.225 s <sup>-1</sup>     | Ca <sup>2+</sup> dissociation from Ca <sup>2+</sup> -activating site                            |

**Supplementary References**

27. Sugawara, H., Kurosaki, M., Takata, M., & Kurosaki, T. Genetic evidence for involvement of type 1, type 2 and type 3 inositol 1,4,5-trisphosphate receptors in signal transduction through the B-cell antigen receptor. *EMBO J.* **16**, 3078-3088 (1997).
28. Tovey, S. C., Sun, Y., & Taylor, C. W. Rapid functional assays of intracellular Ca<sup>2+</sup> channels. *Nature Protocols* **1**, 258-262 (2006).
29. Rapp, G. & Guth, K. A low cost, high intensity flash device for photolysis experiments. *Pflüg. Archiv.* **411**, 200-203 (1988).
30. Walker, J. W., Somlyo, A. V., Goldman, Y. E., Somlyo, A. P., & Trentham, D. R. Kinetics of smooth and skeletal muscle activation by laser pulse photolysis of caged inositol 1,4,5-trisphosphate. *Nature* **327**, 249-252 (1987).
31. Qin, F. Restoration of single-channel currents using the segmental k-means method based on hidden Markov modeling. *Biophys. J.* **86**, 1488-1501 (2004).
32. Ding, S. & Sachs, F. Evidence for non-independent gating of P2X<sub>2</sub> receptors expressed in *Xenopus* oocytes. *BMC Neurosci.* **3**, 17-28 (2002).
33. Ching, L. L., Williams, A. J., & Sitsapesan, R. AMP is a partial agonist at the sheep cardiac ryanodine receptor. *Br. J. Pharmacol.* **127**, 161-171 (1999).
34. Mogami, H., Kanzaki, M., Nobusawa, R., Zhang, Y. Q., Furukawa, M., & Kojima, I. Modulation of adenosine triphosphate-sensitive potassium channel and voltage-dependent calcium channel by activin A in HIT-T15 cells. *Endocrinol.* **136**, 2960-2966 (1995).
35. McManus, O. B., Blatz, A. L., & Magleby, K. L. Sampling, log binning, fitting, and plotting durations of open and shut intervals from single channels and the effects of noise. *Pflüg. Archiv.* **410**, 530-553 (1987).
36. Sigworth, F. J. & Sine, S. M. Data transformations for improved display and fitting of single-channel dwell time histograms. *Biophys. J.* **52**, 1047-1054 (1987).
37. Sunderman, E. R. & Zagotta, W. N. Mechanism of allosteric modulation of rod cyclic nucleotide-gated channels. *J. Gen. Physiol.* **113**, 601-620 (1999).



38. Colquhoun, D. & Sigworth, F. J., in *Single-Channel Recording*, edited by B. Sakmann & E. Neher, Plenum Press, New York, pp. 483-587 (1995).
39. Colquhoun, D. & Hawkes, A. G., in *Single-Channel Recording*, edited by B. Sakmann & E. Neher, Plenum Press, New York, pp. 397-482 (1995).
40. Anantharam, A., Tian, Y., & Palmer, L. G. Open probability of the epithelial sodium channel is regulated by intracellular sodium. *J. Physiol.* **574**, 333-347 (2006).
41. Palmer, L. G. & Frindt, G. Amiloride-sensitive Na channels from the apical membrane of the rat cortical collecting tubule. *Proc. Natl. Acad. Sci. USA* **83**, 2767-2770 (1986).
42. da Fonseca, P. C. A., Morris, S. A., Nerou, E. P., Taylor, C. W., & Morris, E. P. Domain organisation of the type 1 inositol 1,4,5-trisphosphate receptor as revealed by single-particle analysis. *Proc. Natl. Acad. Sci. USA* **100**, 3936-3941 (2003).
43. Straube, R. & Falcke, M. Reversible clustering under the influence of a periodically modulated binding rate. *Phys. Rev. E* **76**, 010402-1-010402-4 (2007).
44. Falcke, M. On the role of stochastic channel behavior in intracellular  $\text{Ca}^{2+}$  dynamics. *Biophys. J.* **84**, 42-56 (2003).
45. Li, W.-H., Llopis, J., Whitney, M., Zlokarnik, G., & Tsien, R. Y. Cell-permeant caged  $\text{InsP}_3$  ester shows that  $\text{Ca}^{2+}$  spike frequency can optimize gene expression. *Nature* **392**, 936-941 (1998).
46. Dolmetsch, R. E., Lewis, R. S., Goodnow, C. C., & Healy, J. I. Differential activation of transcription factors induced by  $\text{Ca}^{2+}$  response amplitude and duration. *Nature* **386**, 855-858 (1997).
47. Bentele, K. & Falcke, M. Quasi-steady approximation for ion channel currents. *Biophys. J.* **93**, 2597-2608 (2007).
48. Smith, G. D., Dai, L., Miura, R. M., & Sherman, A. Asymptotic analysis of buffered calcium diffusion near a point source. *SIAM J. Appl. Math.* **16**, 1816-1838 (2001).
49. De Young, G. W. & Keizer, J. A single-pool inositol 1,4,5-trisphosphate-receptor-based model for agonist-stimulated oscillations in  $\text{Ca}^{2+}$  concentration *Proc. Natl. Acad. Sci. USA* **89**, 9895-9899 (1992).
50. Dargan, S. L., Schwaller, B., & Parker, I. Spatiotemporal patterning of  $\text{IP}_3$ -mediated  $\text{Ca}^{2+}$  signals in *Xenopus* oocytes by  $\text{Ca}^{2+}$ -binding proteins. *J. Physiol.* **556**, 447-461 (2004).
51. Kenyon, J. L. & Bauer, R. J. Amplitude histograms can identify positively but not negatively coupled channels. *J. Neurosci. Methods* **96**, 105-111 (2000).

**Supplementary Table 1 | Distributions of IP<sub>3</sub>R3 before and after IP<sub>3</sub> pre-treatment**

|                                               | IP <sub>3</sub> R/patch |          |
|-----------------------------------------------|-------------------------|----------|
|                                               | Mean ± SEM (n)          | Variance |
| Naive                                         | 1.06 ± 0.15 (63)        | 1.39     |
| IP <sub>3</sub> pre-treatment                 | 1.03 ± 0.21 (88)        | 3.84     |
| IP <sub>3</sub> treatment followed by washout | 1.02 ± 0.18 (40)        | 1.26     |

Numbers of IP<sub>3</sub>R/patch are shown for naive nuclei, after pre-treatment with 10 μM IP<sub>3</sub> for ~2 min and the latter followed by washout of IP<sub>3</sub> (see Figs 3a-d). For naive nuclei and those allowed to recover, the mean and variance are similar, consistent with a Poisson distribution. These comparisons include only results collected in parallel for the three conditions, the sample size (63 vs 109) and mean (1.06 vs 1.34) for naive nuclei are therefore slightly different from those cited in the text, which include results from all naive nuclei. Although the distribution of IP<sub>3</sub>R between patches changed dramatically after IP<sub>3</sub> pre-treatment (Fig. 3a, c, and reflected in the increased variance above), the number of IP<sub>3</sub>R/patch averaged over all patches was unaffected by IP<sub>3</sub>, confirming that IP<sub>3</sub> affected neither the area of the patch nor our ability to resolve IP<sub>3</sub>R activity.

**Supplementary Table 2 | Properties of IP<sub>3</sub>R3 within single and multi-IP<sub>3</sub>R3 patches**

| Number of IP <sub>3</sub> R | EC <sub>50</sub> | maximal P <sub>o</sub> |
|-----------------------------|------------------|------------------------|
| 1                           | 1.38 ± 0.03 μM   | 0.44 ± 0.05            |
| 2                           | 2.02 ± 0.20 μM   | 0.25 ± 0.03            |
| 3                           | 2.47 ± 0.25 μM   | 0.26 ± 0.02            |
| 4                           | ND               | 0.24 ± 0.02            |
| 5                           | ND               | 0.26 ± 0.03            |

From excised nuclear patches fortuitously containing the indicated numbers of IP<sub>3</sub>R, the maximal open probability for each IP<sub>3</sub>R (P<sub>o</sub>) and the concentration-dependent effect of NP<sub>o</sub> (EC<sub>50</sub>) were computed (n = 3-7; 2 for the 5-IP<sub>3</sub>R patch). For each concentration-effect relationship, curves were fitted to a Hill equation using non-linear unweighted least-squares regression, with error bars for EC<sub>50</sub> values calculated from the sample variance of the residuals (GraphPad Prism). ND, not determined because too few recordings included 4 or 5 IP<sub>3</sub>R to allow analysis of concentration-effect relationships.

**Supplementary Table 3 | Effects of IP<sub>3</sub>R clustering on closed times distributions**

| Number of IP <sub>3</sub> R | Intra-burst closed time |              | Inter-burst closed time |              |
|-----------------------------|-------------------------|--------------|-------------------------|--------------|
|                             | $\tau_{c1}$ (ms)        | contribution | $\tau_{c2}$ (ms)        | contribution |
| 1                           | $1.4 \pm 0.09$          | $86 \pm 6\%$ | $120 \pm 9$             | $14 \pm 1\%$ |
| 2                           | $1.05 \pm 0.05$         | $82 \pm 6\%$ | $108 \pm 11$            | $16 \pm 5\%$ |
| 3                           | $1.05 \pm 0.11$         | $82 \pm 2\%$ | $121 \pm 17$            | $16 \pm 2\%$ |

Closed time distributions were fitted using the method of maximum likelihood<sup>44</sup> to recordings from patches containing 2 or 3 IP<sub>3</sub>R after idealization with SKM in QuB (Supplementary Fig. 5). Because clustered IP<sub>3</sub>R gate independently (Fig. 2f, Supplementary Figs 1, 2c), the long inter-burst intervals measured in multi-IP<sub>3</sub>R patches ( $\tau_{ib}$ ) can be used to infer the underlying inter-burst intervals for individual IP<sub>3</sub>R ( $\tau_{c2}$ ):  $\tau_{c2} = N \cdot \tau_{ib}$ . These calculated values of  $\tau_{c2}$  are shown in the table. The short intra-burst closed events ( $\tau_{c1}$ ) are unlikely to be significantly affected by the presence of other IP<sub>3</sub>R, and are shown as directly determined from recordings of patches with lone or multiple IP<sub>3</sub>R. The results demonstrate that neither  $\tau_{c1}$  nor  $\tau_{c2}$  is affected by clustering of IP<sub>3</sub>R.

**Supplementary Table 4 | Burst analysis of lone and clustered IP<sub>3</sub>R3**

|               | lone            |                 | clustered       |                 |
|---------------|-----------------|-----------------|-----------------|-----------------|
|               | observed        | simulated       | observed        | simulated       |
| $P_o$         | $0.44 \pm 0.05$ | $0.44 \pm 0.02$ | $0.24 \pm 0.01$ | $0.23 \pm 0.01$ |
| $\tau_o$ (ms) | $11.9 \pm 1.6$  | $12.6 \pm 0.2$  | $5.40 \pm 0.5$  | $5.5 \pm 0.11$  |
| $\tau_b$ (ms) | $143 \pm 18$    | $131 \pm 6$     | ND              | $55 \pm 1.7$    |
| $n_b$         | $14.5 \pm 3$    | $9.2 \pm 0.5$   | ND              | $9.1 \pm 0.6$   |

Using the gating scheme shown in Fig. 1d, the activity of lone and clustered IP<sub>3</sub>R (differing only in  $k_{01}$ ) were simulated (for 20 s,  $n = 5$ ) using QuB<sup>60</sup> (Supplementary Fig. 6). The table shows the properties (means  $\pm$  SEM) of individual IP<sub>3</sub>R either alone or within a cluster derived from burst analysis using ClampFit with a critical time of 10 ms. In addition to  $P_o$  and  $\tau_o$ , the burst duration ( $\tau_b$ ) and number of openings per burst ( $n_b$ ) are shown. The results demonstrate that the gating scheme faithfully replicates the observed gating parameters for both lone and clustered IP<sub>3</sub>R.

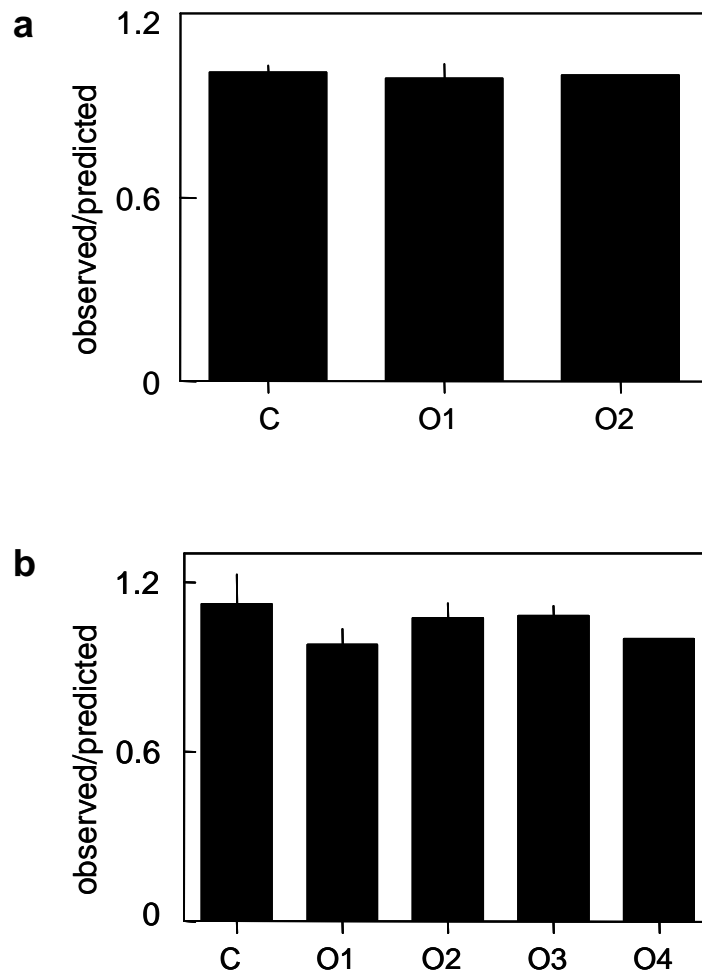

**Supplementary Figure 1 | IP<sub>3</sub>R3 open independently in patches containing multiple IP<sub>3</sub>R3.** **a, b,** For nuclear patches containing 2 (a) or 4 (b) IP<sub>3</sub>R3, the binomial distribution was used to calculate probabilities for the indicated numbers of simultaneous openings for IP<sub>3</sub>R stimulated with 10  $\mu$ M IP<sub>3</sub> in 200 nM free Ca<sup>2+</sup>. The histogram shows the observed probability divided by the predicted probability. These results, together with those in Fig. 2f, demonstrate that IP<sub>3</sub>R open independently in patches with several IP<sub>3</sub>R.

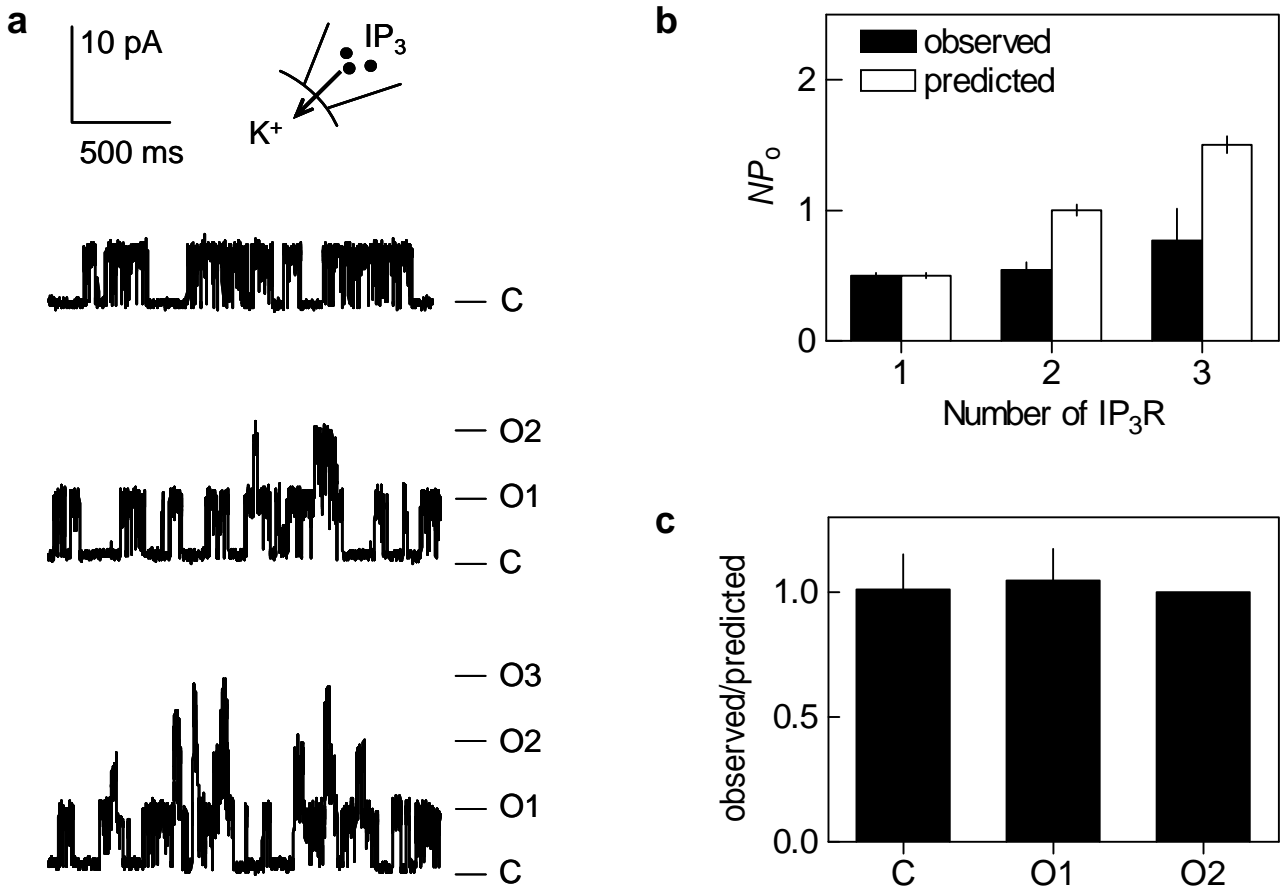

**Supplementary Figure 2 | IP<sub>3</sub>-evoked clustering also inhibits IP<sub>3</sub>R1.** **a**, Typical recordings from nuclei isolated from DT40-IP<sub>3</sub>R1 cells at a holding potential of +40 mV and with 10 μM IP<sub>3</sub>, 0.5 mM ATP and 200 nM free Ca<sup>2+</sup> in PS. The recordings are from patches that included (top to bottom) 1, 2 or 3 IP<sub>3</sub>R. C denotes the closed state. **b**, Observed and predicted  $NP_0$  for patches containing 1, 2 or 3 IP<sub>3</sub>R ( $n \geq 3$ ;  $n = 2$  for the patch with 3 IP<sub>3</sub>R). Predicted  $NP_0$  was calculated by assuming that  $P_0$  for each IP<sub>3</sub>R within a multi-IP<sub>3</sub>R patch has the same  $P_0$  as a lone IP<sub>3</sub>R (ie  $P_{\text{lone}}$ ). **c**, For patches containing 2 IP<sub>3</sub>R, observed and predicted open probabilities are shown for the indicated open states. Predicted values were calculated from the binomial distribution (Supplementary equation 4). Observed/predicted values are shown (mean  $\pm$  SEM,  $n = 5$ ). These results establish that within patches containing more than one IP<sub>3</sub>R1, each IP<sub>3</sub>R opens independently, but to a lower  $P_0$  than for lone IP<sub>3</sub>R1.

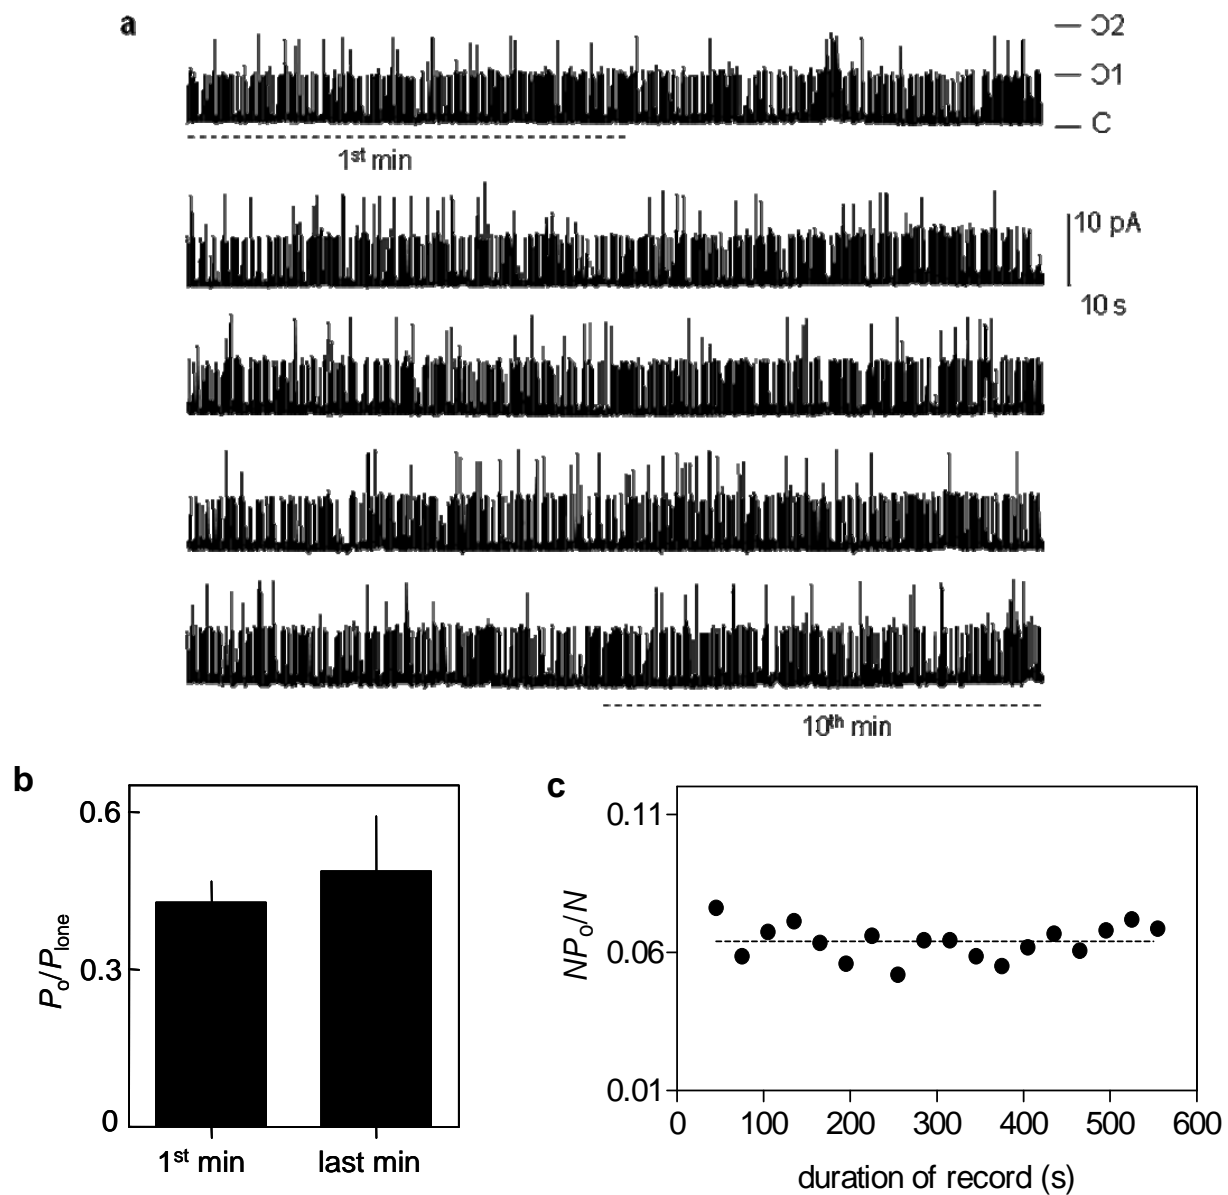

**Supplementary Figure 3 | Sustained activity of IP<sub>3</sub>R3 during sustained stimulation with IP<sub>3</sub>.** **a**, Typical 10-min recording from an excised patch containing 2 IP<sub>3</sub>R stimulated with 1 μM IP<sub>3</sub> in PS containing 200 nM free Ca<sup>2+</sup>. C and O denote closed and open states. **b**, From similar recordings,  $P_o$  was measured during the first and last minute of recordings that lasted 10-15 min from patches that contained 2 IP<sub>3</sub>R. In all recordings, the estimated number of IP<sub>3</sub>R was the same during each recording interval.  $P_o/P_{lone}$  was calculated from the binomial distribution (as in Fig. 3e);  $n = 4$ . **c**, Stability plot of the record shown in **a**. The results demonstrate that IP<sub>3</sub> causes IP<sub>3</sub>R to attain their maximally inhibited state within the time taken to establish a recording (typically 30-45 s) and the activity remains stable thereafter for many min. We conclude that IP<sub>3</sub>R clustering (reflected in  $P_o/P_{lone}$ ) is complete within seconds of maximal stimulation with IP<sub>3</sub>.

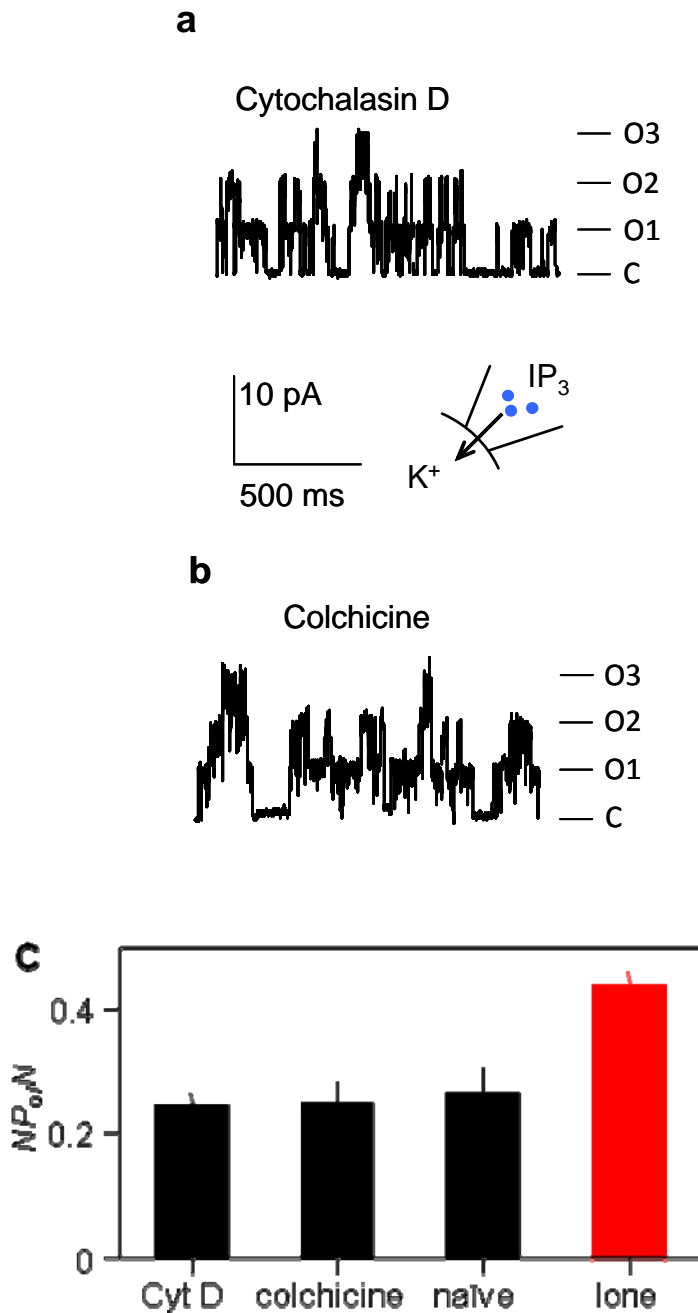

**Supplementary Figure 4 | IP<sub>3</sub>-evoked clustering does not require the cytoskeleton. a, b,** Nuclei of DT40-IP<sub>3</sub>R3 cells were pretreated with cytochalasin D (a, Cyt D, 20  $\mu$ M, Calbiochem) to promote depolymerization of actin, or with colchicine (b, 100  $\mu$ M, Sigma) to disrupt microtubules for 30 min before patch-clamp recording. Typical records from patches with three IP<sub>3</sub>R are shown. C and O1-O3 denote the closed and open states. **c,**  $NP_o/N$  is shown for nuclear patches with 2-5 IP<sub>3</sub>R (black) or for patches with a single IP<sub>3</sub>R (red). Results are means  $\pm$  SEM,  $n \geq 3$ . The results demonstrate that disruption of the cytoskeleton does not affect IP<sub>3</sub>-evoked clustering of IP<sub>3</sub>R.

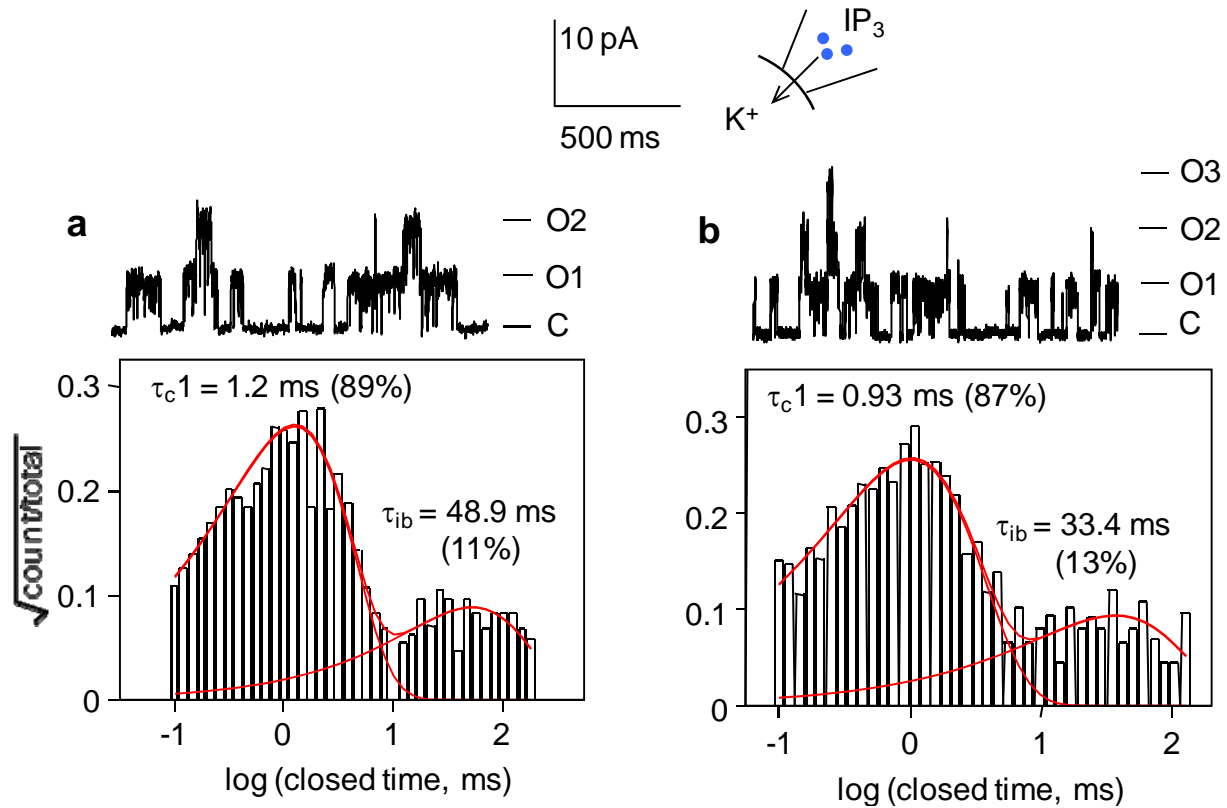

**Supplementary Figure 5 | Clustering has no effect on closed states of the IP<sub>3</sub>R. a, b.** Typical recordings from patches with 2 (a) or 3 (b) IP<sub>3</sub>R3, and their respective closed-time histograms. Empirical fitting of the closed time histograms identified two populations of closed states:  $\tau_{c1}$  representing closures within a burst and  $\tau_{ib}$  representing closures between bursts. Because IP<sub>3</sub>R open independently under these conditions (Fig. 2f, Supplementary Figs 1b, 2c), the inter-burst closed time for individual IP<sub>3</sub>R within a cluster ( $\tau_{c2}$ ) can be calculated from:  $\tau_{c2} = N\tau_{ib}$  (Supplementary Table 3).



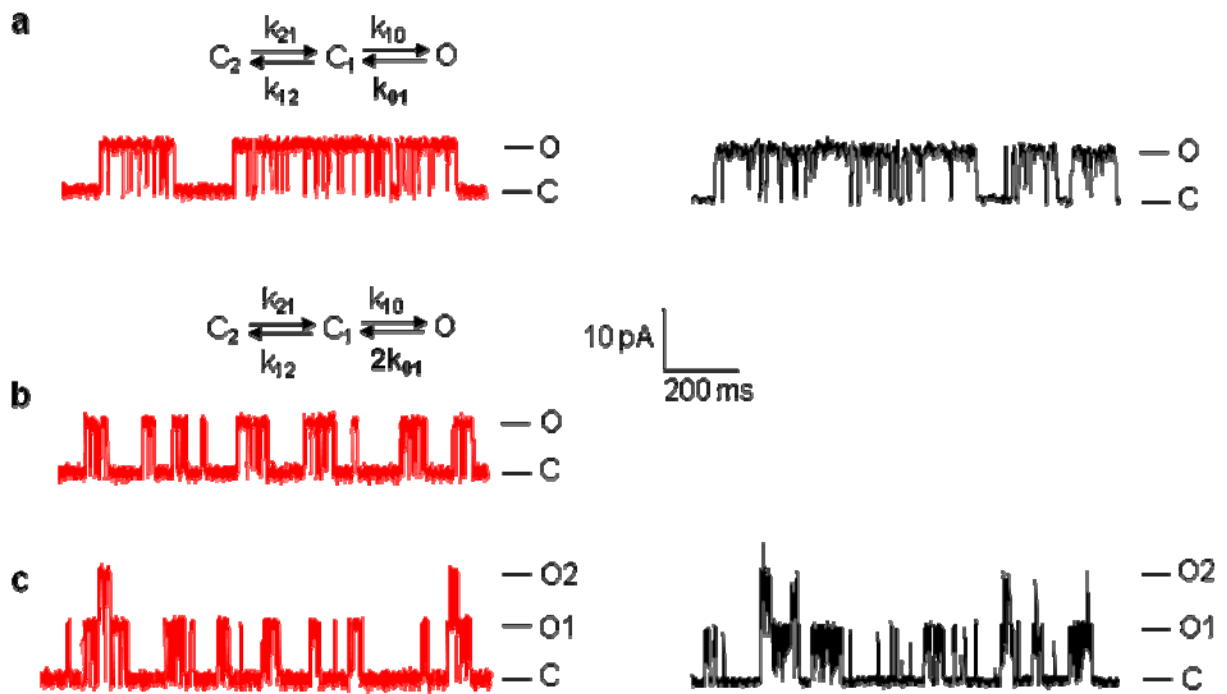

**Supplementary Figure 6 | Comparison of observed and simulated activities of lone and clustered IP<sub>3</sub>R.** **a, b,** Typical observed (black) and simulated (red) IP<sub>3</sub>R activities for lone IP<sub>3</sub>R (a) or individual IP<sub>3</sub>R within a cluster (b), each stimulated with 10 μM IP<sub>3</sub> and 200 nM free Ca<sup>2+</sup>. The gating scheme is the same for each, but with k<sub>01</sub> doubled for clustered IP<sub>3</sub>R. **c,** Behaviour of a cluster of 2 IP<sub>3</sub>R. The noise (r.m.s noise) of real records was imposed during simulations and the records filtered at 1 kHz for display. C and O show closed and open current levels. Further details in Supplementary Table 4. The results show that the gating scheme faithfully captures the behaviour of lone and clustered IP<sub>3</sub>R (Supplementary Table 4).

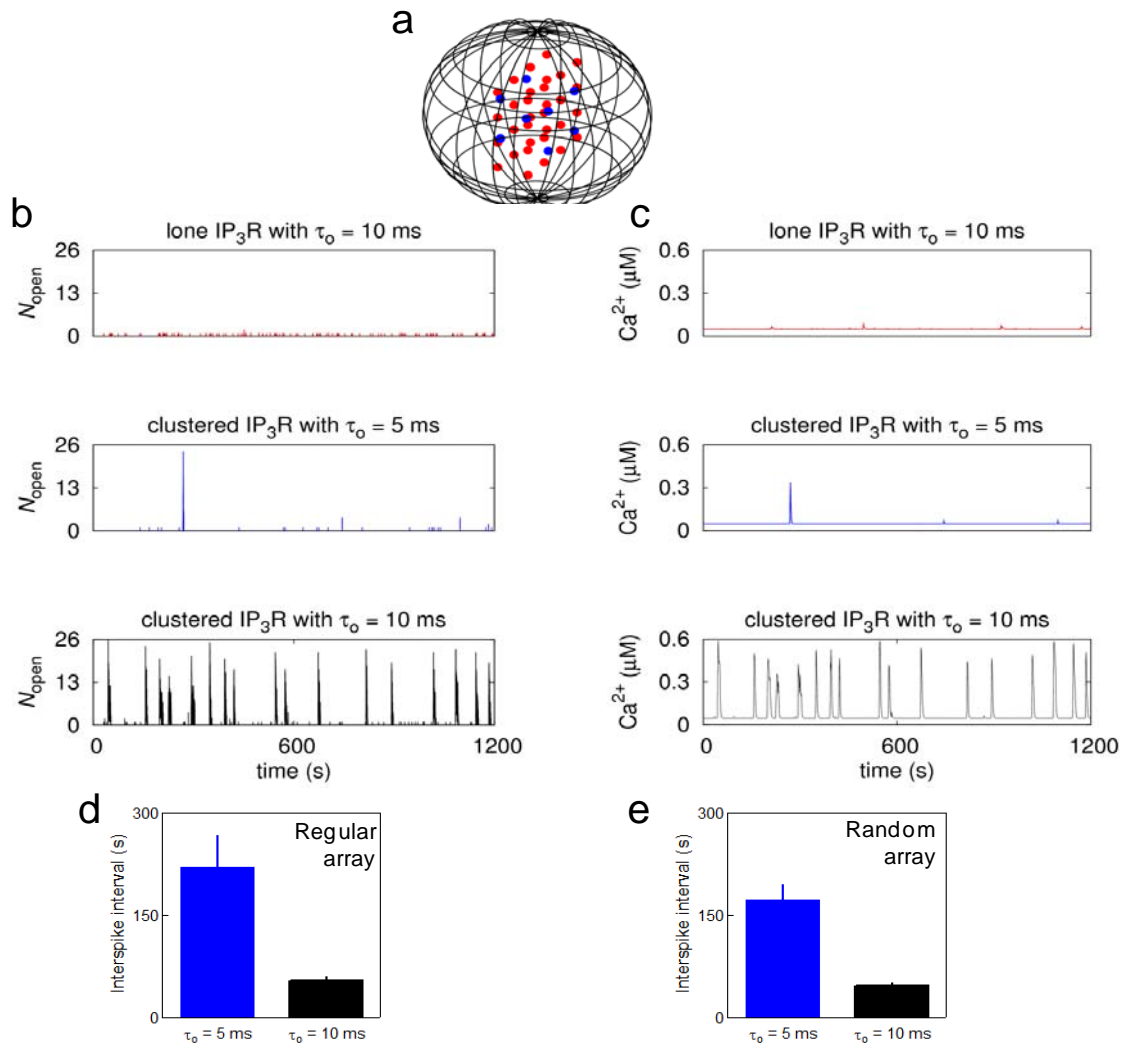

**Supplementary Figure 7 | Clustering of IP<sub>3</sub>R is required for Ca<sup>2+</sup> spiking, and the decrease in  $\tau_o$  caused by clustering profoundly affects the frequency of spiking.** **a**, Simulations use either a regular array of 32 lone IP<sub>3</sub>R (red) or a regular array of 8 clusters, each with 4 IP<sub>3</sub>R (blue). The simulations compare the effects of decreasing  $\tau_o$  from 10 ms to 5 ms, as described in Supplementary Discussion. **b**, **c**, Results of representative simulations show time courses for the numbers of open IP<sub>3</sub>R (**b**) and global cytosolic free [Ca<sup>2+</sup>] (**c**). Comparison of the corresponding panels in **b** and **c** shows that the near simultaneous opening of several clusters is required to generate a Ca<sup>2+</sup> spike. The behaviour of lone IP<sub>3</sub>R is not sufficiently coordinated to generate a Ca<sup>2+</sup> spike. **d**, Summary results from 10 independent simulations (means  $\pm$  SEM) showing the mean interval between Ca<sup>2+</sup> spikes, with each spike defined as an increase in free [Ca<sup>2+</sup>] of  $\geq 0.25$   $\mu$ M. **e**, Similar analysis to **d**, but with randomly distributed clusters ( $n = 5$  simulations). The mobile buffer concentration, [B]<sub>T</sub>, was the same in all parallel comparisons of IP<sub>3</sub>R behaviour. [B]<sub>T</sub> was 65  $\mu$ M in **b** and **c**, 45-65  $\mu$ M in **d**, and 60  $\mu$ M in **e**. All other parameter values are given in Parameter Tables 1 and 2. The results demonstrate that for clustered IP<sub>3</sub>R, a 2-fold decrease in  $\tau_o$  causes the inter-spike interval (ISI) to increase by  $\sim$ 4-fold. The results confirm the importance of IP<sub>3</sub>R clustering and the physiological significance of the decrease in  $\tau_o$  associated with clustering.

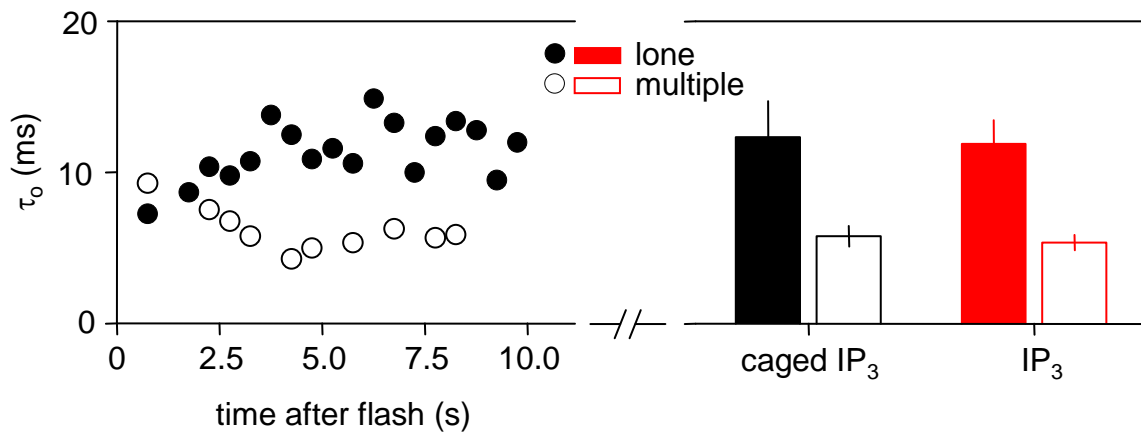

**Supplementary Figure 8 | Kinetics of IP<sub>3</sub>R3 clustering resolved by photolysis of caged IP<sub>3</sub>.** From experiments similar to that shown in Fig. 3h,  $\tau_0$  was measured during each 0.5 s interval (1.5 s for the first interval) after photo-release of IP<sub>3</sub> within the patch-pipette. Results (means  $\pm$  SEM for 4 patches with lone IP<sub>3</sub>R, and 7 patches with 2-4 IP<sub>3</sub>R) show that  $\tau_0$  remains constant at  $11.4 \pm 0.5$  ms for lone IP<sub>3</sub>R, but rapidly falls to  $5.8 \pm 0.3$  ms for IP<sub>3</sub>R within multi-IP<sub>3</sub>R patches. The histograms show the steady-state measurements of  $\tau_0$  measured 5-120 s after flash-photolysis of caged IP<sub>3</sub> (black) and determined from experiments with IP<sub>3</sub> included in PS (red, as for Figs 1, 2). These results establish that after photo-release of IP<sub>3</sub>,  $\tau_0$  rapidly reaches a steady-state value identical to that determined by including IP<sub>3</sub> in the patch-pipette.

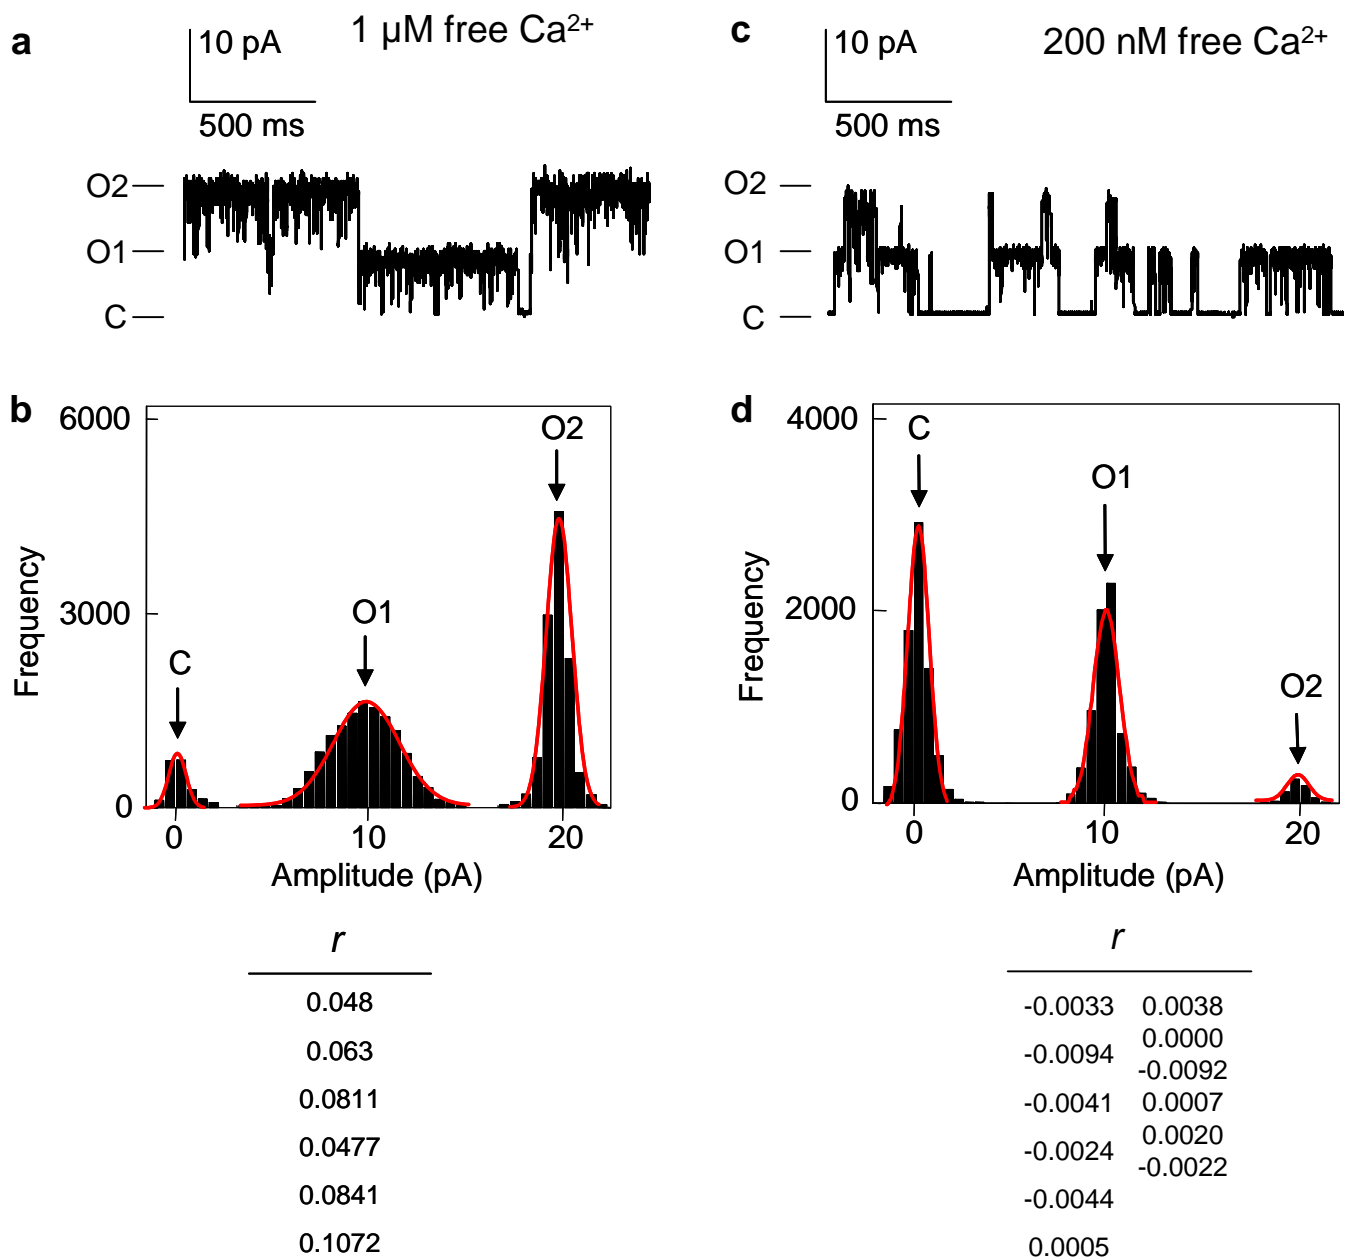

**Supplementary Figure 9 | Coupled gating of clustered IP<sub>3</sub>R stimulated with IP<sub>3</sub> and high Ca<sup>2+</sup>.** **a**, Typical recording from a patch with 2 IP<sub>3</sub>R3 stimulated with 10  $\mu\text{M}$  IP<sub>3</sub> and 1  $\mu\text{M}$  Ca<sup>2+</sup>. Closed (C) and the 2 open states (O1 and O2) are shown. **b**, Amplitude histogram of the recording shown in **a**, fitted (red line) to Gaussian distributions, from which the probabilities ( $P_c$ ,  $P_{o,1}$  and  $P_{o,2}$ ) for each state (C, O1 and O2) were calculated. These values were used to calculate the "coupling factor",  $r = -[(P_{o,1})^2/4] - P_c P_{o,2}$ ;  $r > 0$  denotes positively coupled gating of channels<sup>51</sup>. **c**, **d**, Show an equivalent trace and amplitude histogram for a patch with 2 IP<sub>3</sub>R stimulated with 10  $\mu\text{M}$  IP<sub>3</sub> and 200 nM Ca<sup>2+</sup>. Values of  $r$  from 6 (1  $\mu\text{M}$  Ca<sup>2+</sup>) and 12 (200 nM Ca<sup>2+</sup>) independent recordings are summarized below the appropriate panels. The results indicate that  $r$  is invariably  $> 0$  for IP<sub>3</sub>R stimulated at high Ca<sup>2+</sup> ( $0.072 \pm 0.009$ ; consistent with positively cooperative gating), but generally  $\leq 0$  for IP<sub>3</sub>R stimulated in 200 nM Ca<sup>2+</sup> ( $-0.002 \pm 0.001$ ; consistent with a lack of positive co-operativity). This analysis further supports our conclusion (Fig. 4) that clustered IP<sub>3</sub>R show coupled gating when Ca<sup>2+</sup> is increased.
